# Supplementary material
Source: PubMed Central journal article supplement (PMC6482460)
Supplement: NIHMS1021588-supplement-Suppl_2.pdf [file NIHMS1021588-supplement-Suppl_2.pdf]

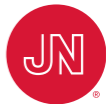

## **The Cardiac Arrest Survival Postresuscitation In-Hospital (CASPRI) Score**

This supplementary material has been provided by the author to give readers additional information about their work.

Andersen LW, Holmberg MJ, Berg K, et al. In-hospital cardiac arrest: a review. *JAMA*. doi:10.1001/jama.2019.1696

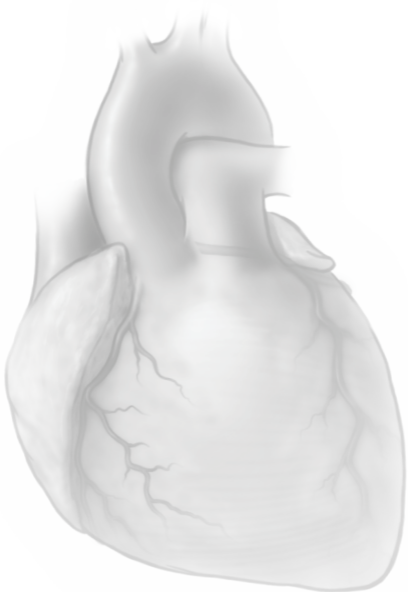

## Determination of the CASPRI Score

For this cardiac arrest risk score, points for each variable are determined, and a summary score is obtained.

| <b>1. Age group, y</b> | <b>Points</b> |
|------------------------|---------------|
| <50                    | 0             |
| 50-59                  | 0             |
| 60-69                  | 1             |
| 70-79                  | 2             |
| ≥80                    | 4             |

| <b>2. Initial arrest rhythm;<br/>VF/VT time to defibrillation</b> | <b>Points</b> |
|-------------------------------------------------------------------|---------------|
| ≤2 minutes                                                        | 0             |
| 3 minutes                                                         | 0             |
| 4-5 minutes                                                       | 2             |
| >5 minutes                                                        | 3             |
| Pulseless electrical activity                                     | 6             |
| Asystole                                                          | 7             |

| <b>3. Prearrest CPC score</b> | <b>Points</b> |
|-------------------------------|---------------|
| 1                             | 0             |
| 2                             | 2             |
| 3                             | 9             |
| ≥4                            | 9             |

| <b>4. Hospital location</b> | <b>Points</b> |
|-----------------------------|---------------|
| Telemetry unit              | 0             |
| Intensive care              | 1             |
| Nonmonitored unit           | 3             |

| <b>5. Duration of resuscitation, min</b> | <b>Points</b> |
|------------------------------------------|---------------|
| <2                                       | 0             |
| 2-4                                      | 0             |
| 5-9                                      | 3             |
| 10-14                                    | 5             |
| 15-19                                    | 6             |
| 20-24                                    | 6             |
| 25-29                                    | 6             |
| ≥30                                      | 8             |

| <b>Factors present prior to arrest</b> | <b>Points</b> |
|----------------------------------------|---------------|
| <b>6. Mechanical ventilation</b>       | 3             |
| <b>7. Renal insufficiency</b>          | 2             |
| <b>8. Hepatic insufficiency</b>        | 4             |
| <b>9. Sepsis</b>                       | 3             |
| <b>10. Malignant disease</b>           | 4             |
| <b>11. Hypotension</b>                 | 3             |

## Interpretation of the CASPRI Score

The points are added up to form the cardiac arrest survival score. The survival associated with these scores is presented in the following table:

| Cardiac arrest survival score | Mean survival (95% CI), % |
|-------------------------------|---------------------------|
| 0-4                           | 82.6 (78.7-86.5)          |
| 5-9                           | 66.6 (63.8-69.5)          |
| 10-14                         | 42.0 (40.1-44.0)          |
| 15-19                         | 23.1 (21.8-24.4)          |
| 10-24                         | 12.3 (11.1-13.4)          |
| 25-29                         | 5.2 (4.3-6.1)             |
| 30-34                         | 2.1 (1.1-3.2)             |
| 35-39                         | 0                         |
| ≥40                           | 0                         |

### The CASPRI score was derived from

Chan PS, Spertus JA, Krumholz HM, et al; Get With the Guidelines-Resuscitation Registry Investigators. A validated prediction tool for initial survivors of in-hospital cardiac arrest. *Arch Intern Med*. doi:10.1001/archinternmed.2012.2050
